# Supplementary material
Source: MDPI journal article supplement (https://www.mdpi.com/2227-9717/11/6/1729)
Supplement: s1 [file s1]

## SUPPLEMENTARY MATERIAL

**Table S1.** ANOVA of the second order multiple linear regression for the antioxidant capacity

| <i>Source</i> | <i>Sum of squares</i> | <i>Degree of freedom</i> | <i>Variance MS</i> | <i>F-Test</i> | <i>p-Value</i> |
|---------------|-----------------------|--------------------------|--------------------|---------------|----------------|
| Model         | 4102.01               | 2                        | 2051.0             | 12.21         | 0.0001         |
| Residual      | 5373.46               | 32                       | 167.921            |               |                |
| Total (Corr.) | 9475.47               | 34                       |                    |               |                |

R<sup>2</sup> = 62.40

**Table S2.** Second-order model regression coefficients for total polyphenol content

| <b>Term</b>             | <b>Coefficient</b> |
|-------------------------|--------------------|
| <b>Constant</b>         | 130.614            |
| <b>A: MoR</b>           | -6.39756           |
| <b>B: % Added Water</b> | -3.15866           |
| <b>AA</b>               | -6.31696           |
| <b>AB</b>               | 0.0913333          |
| <b>BB</b>               | 0.0370936          |

**Note:** MoR = Molar ratio of glucose per 1 mol of choline chloride

**Table S3.** ANOVA of the complete experimental design for the total polyphenol content

| <i>Source</i>           | <i>Sum of squares</i> | <i>Degree of freedom</i> | <i>Variance MS</i> | <i>F-Test</i> | <i>p-Value</i> |
|-------------------------|-----------------------|--------------------------|--------------------|---------------|----------------|
| <b>A: MoR</b>           | 3700.06               | 1                        | 3700.06            | 2.57          | 0.1193         |
| <b>B: % Added Water</b> | 2198.41               | 1                        | 2198.41            | 1.53          | 0.2260         |
| <b>AA</b>               | 57415.6               | 1                        | 57415.6            | 39.91         | 0.0000         |
| <b>AB</b>               | 499.359               | 1                        | 499.359            | 0.35          | 0.5602         |
| <b>BB</b>               | 8566.4                | 1                        | 8566.4             | 5.95          | 0.0208         |
| <b>Total Error</b>      | 43163.4               | 30                       | 1438.78            |               |                |
| <b>Total (corr.)</b>    | 109269.               | 35                       |                    |               |                |

**Note:** R<sup>2</sup> = 60.5; MoR = Molar ratio of glucose per 1 mol of choline chloride

**Table S4.** Second-order model regression coefficients for antioxidant capacity

| <b>Term</b>             | <b>Coefficient</b> |
|-------------------------|--------------------|
| <b>Constant</b>         | 83.4455            |
| <b>A: MoR</b>           | 30.2858            |
| <b>B: % Added Water</b> | -2.24408           |
| <b>AA</b>               | -13.2041           |
| <b>AB</b>               | -0.248006          |
| <b>BB</b>               | 0.0327891          |

**Note:** MoR = Molar ratio of glucose per 1 mol of choline chloride

**Table S5.** ANOVA of the complete experimental design for the antioxidant capacity

| Source                  | Sum of squares | Degree of freedom | Variance MS | F-Test | p-Value       |
|-------------------------|----------------|-------------------|-------------|--------|---------------|
| <b>A: MoR</b>           | 2385.77        | 1                 | 2385.77     | 21.40  | <b>0.0001</b> |
| <b>B: % Added Water</b> | 0.510349       | 1                 | 0.510349    | 0.00   | 0.9465        |
| <b>AA</b>               | 231.363        | 1                 | 231.363     | 2.08   | 0.1591        |
| <b>AB</b>               | 105.671        | 1                 | 105.671     | 0.95   | 0.3374        |
| <b>BB</b>               | 3652.38        | 1                 | 3652.38     | 32.76  | <b>0.0000</b> |
| <b>Total Error</b>      | 3679.18        | 33                | 111.49      |        |               |
| <b>Total (corr.)</b>    | 11056.9        | 38                |             |        |               |

**Note:** R<sup>2</sup> = 66.72; MoR = Molar ratio of glucose per 1 mol of choline chloride

**Table S6.** First order model ANOVA for individual polyphenols of the first experimental design for the optimization of the NADES conditions

| Polifenol            | Valor-p       | R <sup>2</sup> |
|----------------------|---------------|----------------|
| Protocatechuic Ac.   | <b>0.002</b>  | 54.84          |
| Catechin             | 1.000         | 0.00           |
| Chlorogenic Ac.      | <b>0.001</b>  | 60.47          |
| Cinnamic Ac.         | 1.000         | 0.00           |
| Rutin                | <b>0.000</b>  | 66.10          |
| Quercetin + Luteolin | <b>0.018</b>  | 45.35          |
| Kaempferol           | <b>0.000</b>  | 66.60          |
| Vanillin             | 0.5850        | 4.97           |
| Diosmin + Hesperidin | <b>0.0492</b> | 24.94          |
| Neohesperidin        | 0.2232        | 13.31          |
| Naringenin           | <b>0.000</b>  | 66.65          |
| Apigenin             | <b>0.000</b>  | 66.44          |
| Diosmetin*           | -             | -              |
| Ferulic Ac.          | 0.0523        | 24.49          |

\*This polyphenol presented concentrations equal to zero in all the experiments of the first experimental design

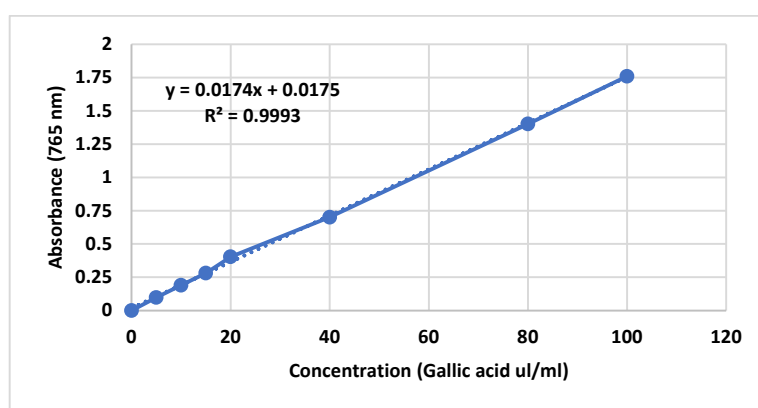**Figure S1.** Calibration curve for the evaluation of the total content of polyphenols in habanero pepper leaf extracts

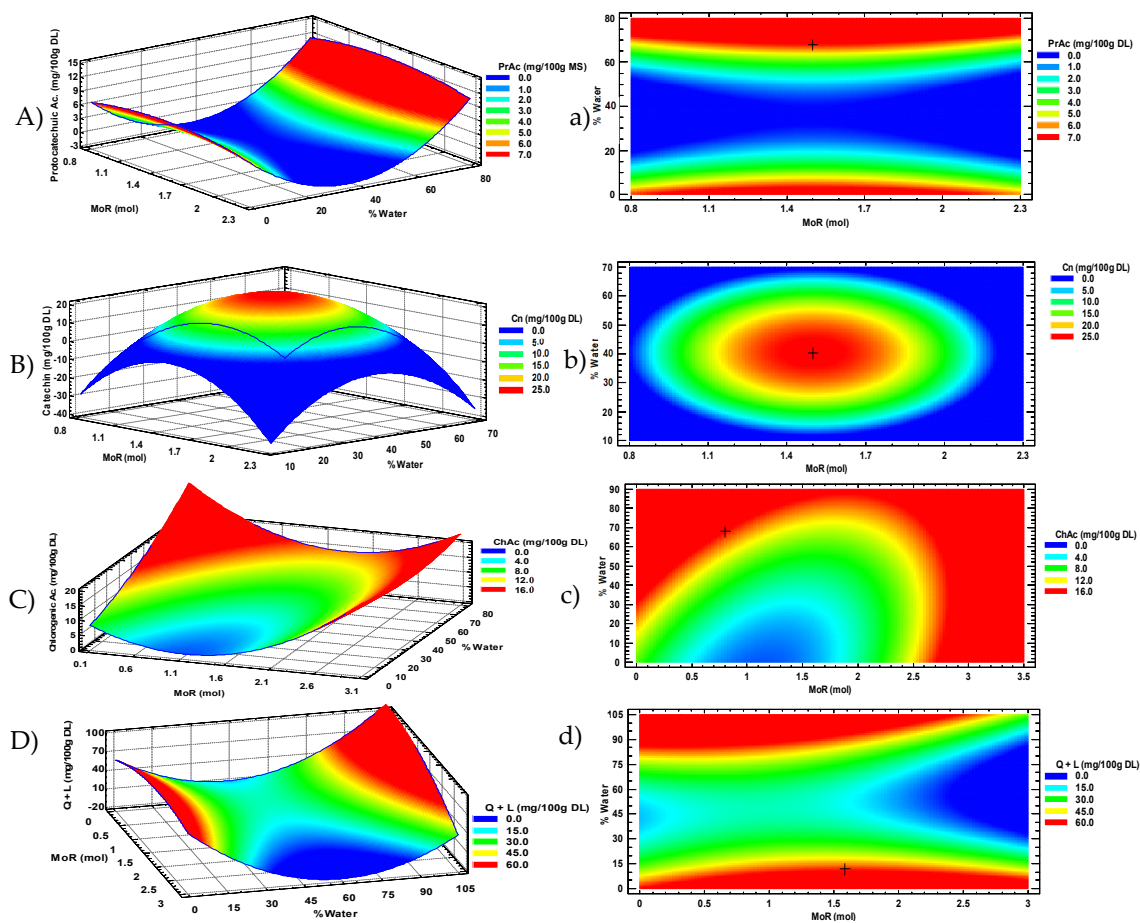

**Figure S2.** Response surface (Capital letter) and contour plot (Lowercase letter) of Protocatechuic acid (A,a); Catechin (B, b); Chlorogenic acid (C, c); Quercetin + Lutein (D, d). Abbreviations: PrAc = Protocatechuic acid; Cn = Catechin; ChAc = Chlorogenic acid; Q + L = Quercetin + Luteolin

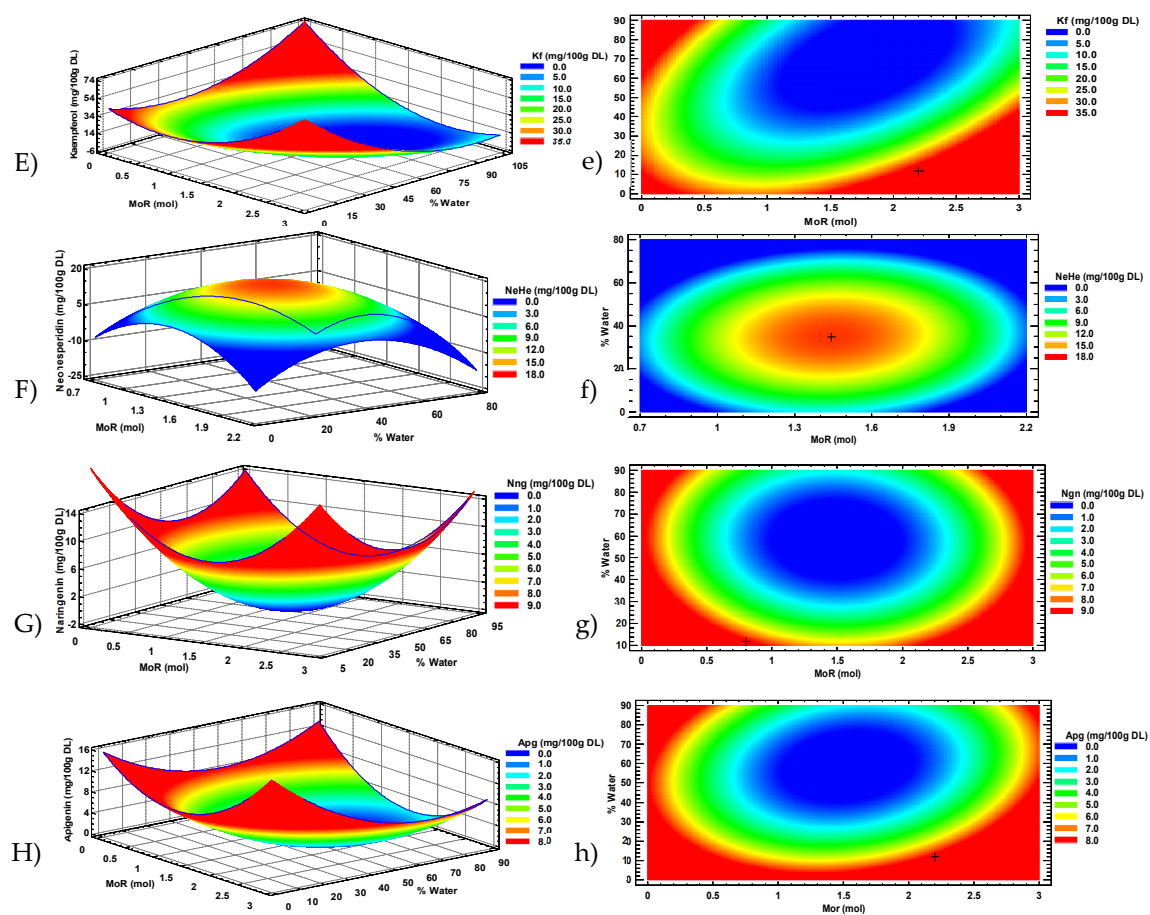

**Figure S3.** Response surface (Capital letter) and contour plot (Lowercase letter) of Kaempferol (E,e); Neohesperidin (F, f); Naringenin (G, g); Apigenin (H, h). Abbreviations: Kf = Kaempferol; NeHe = Neohesperidin; Ngn = Naringenin; Apg = Apigenin

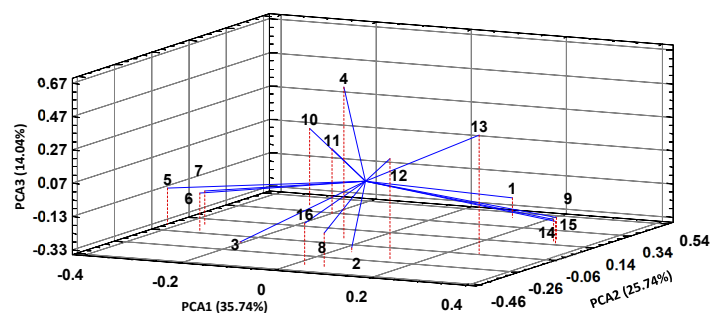

**Figure S4.** Principal component analysis (PCA) with 3 components (PCA1, PCA2 and PCA3) for the total polyphenol content, antioxidant capacity, and polyphenol profile of habanero pepper leaf extracts obtained from the experimental design for composition optimization of a Natural Deep Eutectic Solvent using a sonic probe. Numeration: 1 = Total polyphenol content; 2 = Antioxidant capacity; 3 = Protocatechuic acid; 4 = Catechin; 5 = Chlorogenic acid; 6 = Cinnamic acid; 7 = Rutin; 8 = Quercetin + Luteolin; 9 = Kaempferol; 10 = Ferulic acid; 11 = Vanillin; 12 = Diosmin + Hesperidin; 13 = Neohesperidin; 14 = Naringenin; 15 = Apigenin; 16 = Diosmetin.
